# Supplementary material
Source: publisher figshare collection journal article supplement (https://acs.figshare.com/ndownloader/files/22483706)
Supplement: Supplementary file 1 [file 22483706]

# Supporting Information

## FePt Nanoparticles Embedded in Metal-Organic Framework Nanoparticles for Tumor Imaging and Eradication

*Yanfei Meng,<sup>ab†</sup> Dongsheng Zhang,<sup>a†</sup> Xue Chen,<sup>a</sup> Zhichao Dai,<sup>ab</sup> Xiuxiu Yao,<sup>ac</sup> Ping Cui,<sup>ab</sup> Dexin Yu,<sup>d</sup> Gaorui Zhang<sup>d</sup> and Xiuwen Zheng<sup>\*ab</sup>*

a. Key Laboratory of Functional Nanomaterials and Technology in Universities of Shandong, Linyi University, Linyi 276000, Shandong, P.R. China.

b. College of Chemistry & Chemical Engineering, Linyi University, Linyi 276000, Shandong, P.R. China.

c. College of Chemical and Environmental Engineering, Shandong University of Science and Technology, Qingdao 266590, Shandong, P.R. China.

d. Radiology Departments, Qilu Hospital of Shandong University, Jinan, Shandong, 250000, China.

† These authors contributed equally to this work.

\* E-mail: zhengxiuwen@lyu.edu.cn.

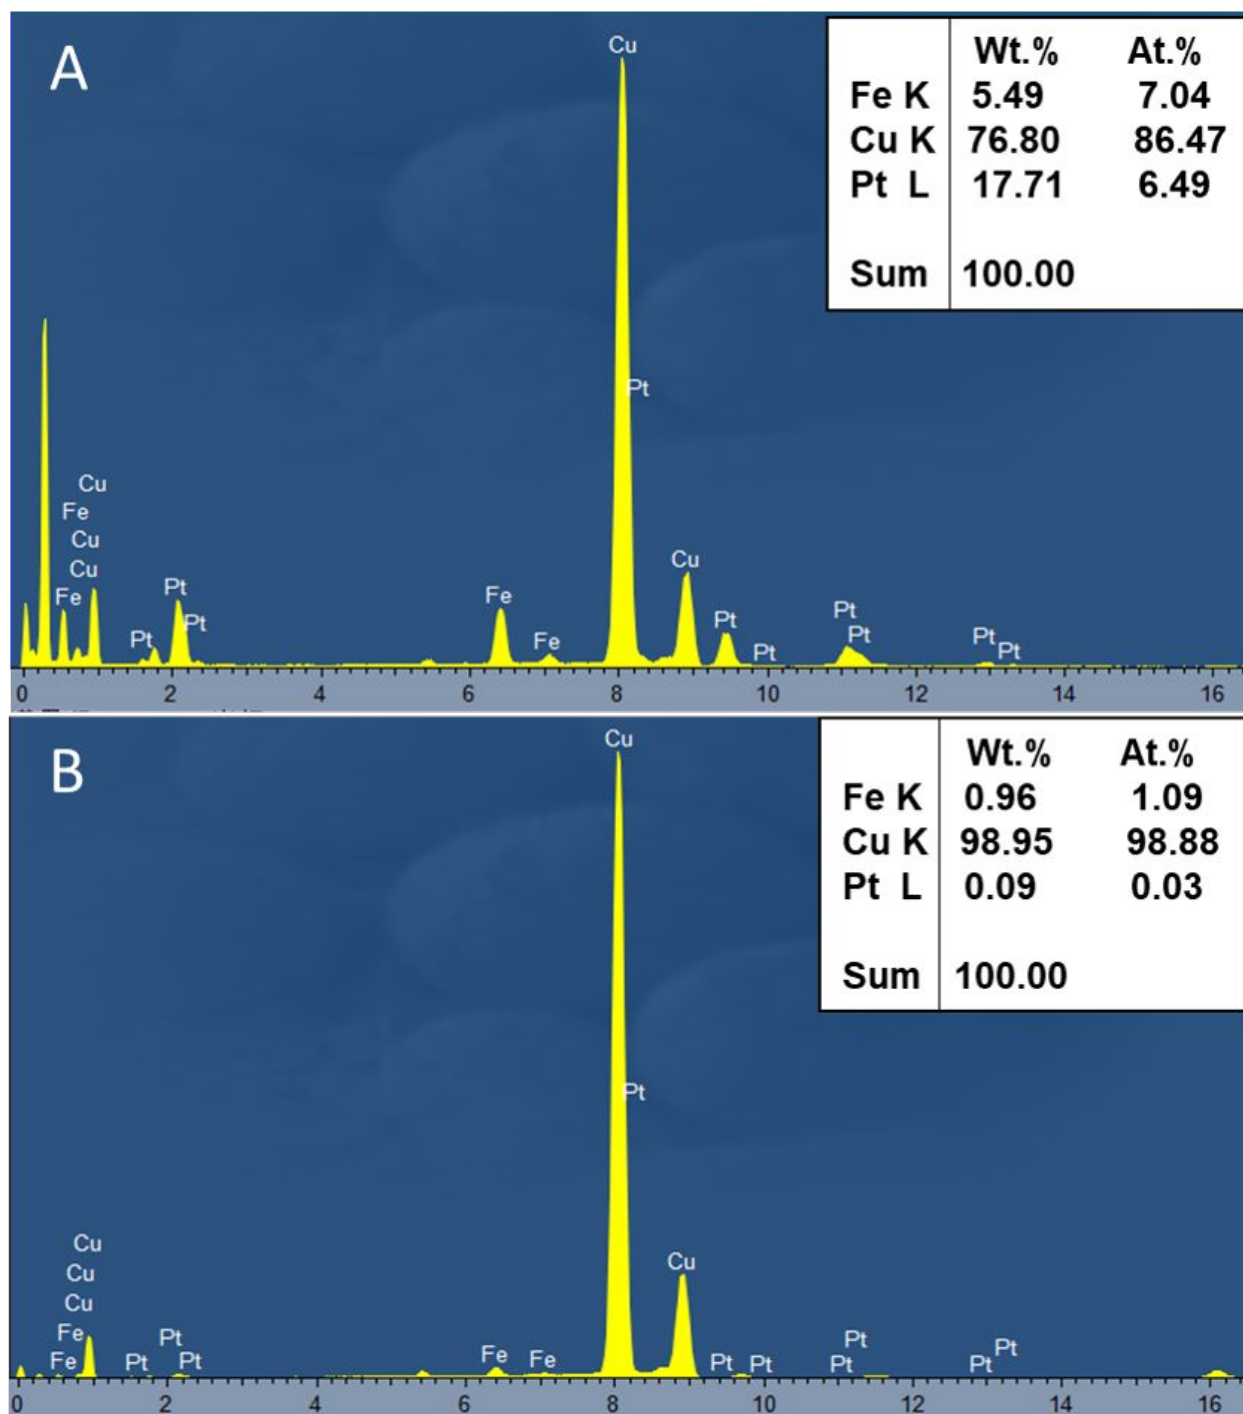

**Fig. S1** (A, B) The EDS date of FePt(S) NCs and FePt(R) NCs, respectively.

| Conditions<br>Groups | Temperature (°C) | Time (min) | Stir | Natural Cool | Ice-bath Cool | Morphology |
|----------------------|------------------|------------|------|--------------|---------------|------------|
| 1                    | 150              | 2.5        |      | ✓            |               | (A)        |
| 2                    | 128              | 25         |      | ✓            |               | (B)        |
| 3                    | 165              | 8          |      | ✓            |               | (C)        |
| 4                    | 165              | 8          |      |              | ✓             | (D)        |
| 5                    | 141              | 12         |      | ✓            |               | (E)        |
| 6                    | 141              | 12         |      |              | ✓             | (F)        |
| 7                    | 137              | 12         | ✓    |              |               | (G)        |

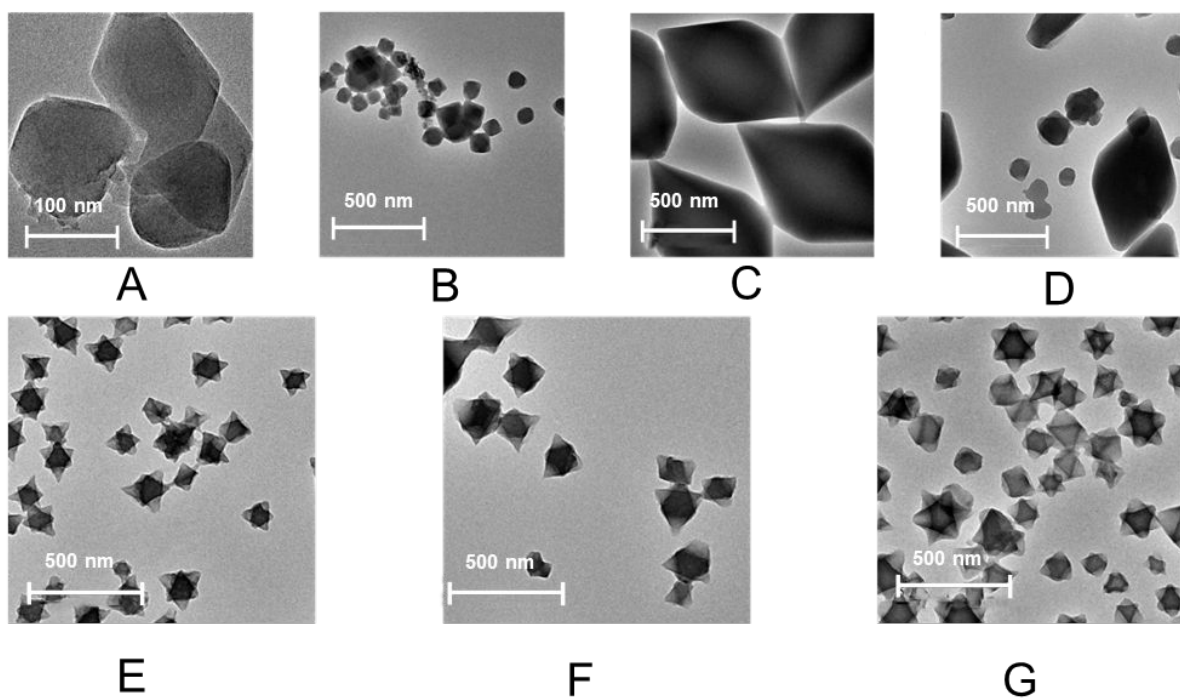

**Fig. S2** The conditions for controlling MIL-101(Fe) synthesis.

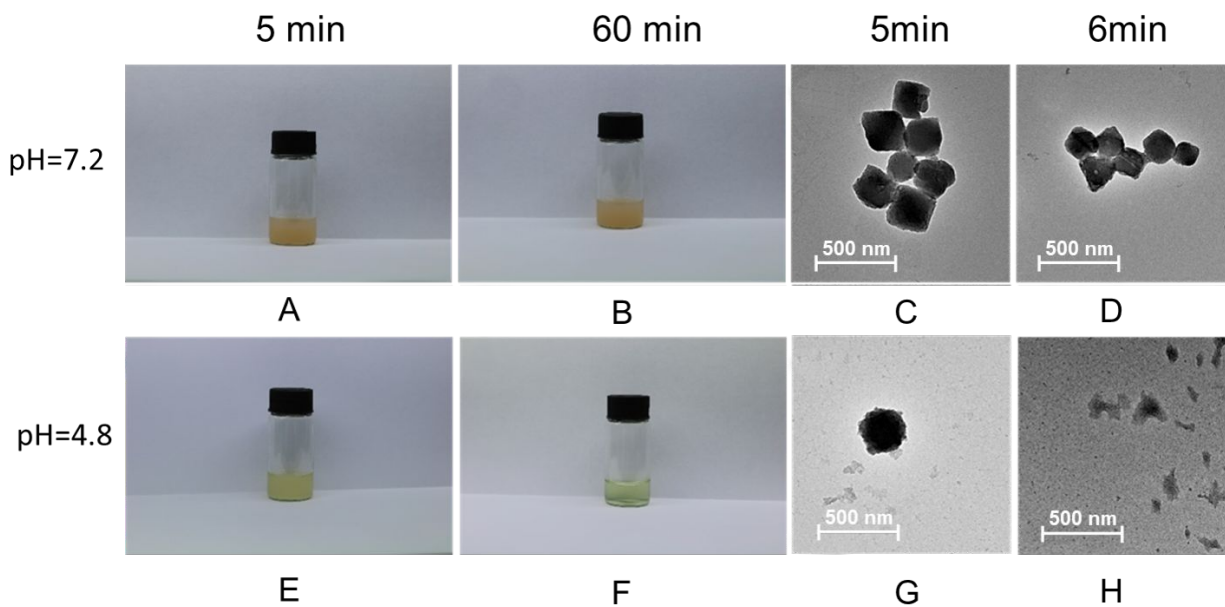

**Fig. S3** The stability of the MIL-101(Fe) under the conditions of pH 7.2 and pH 4.8, respectively.

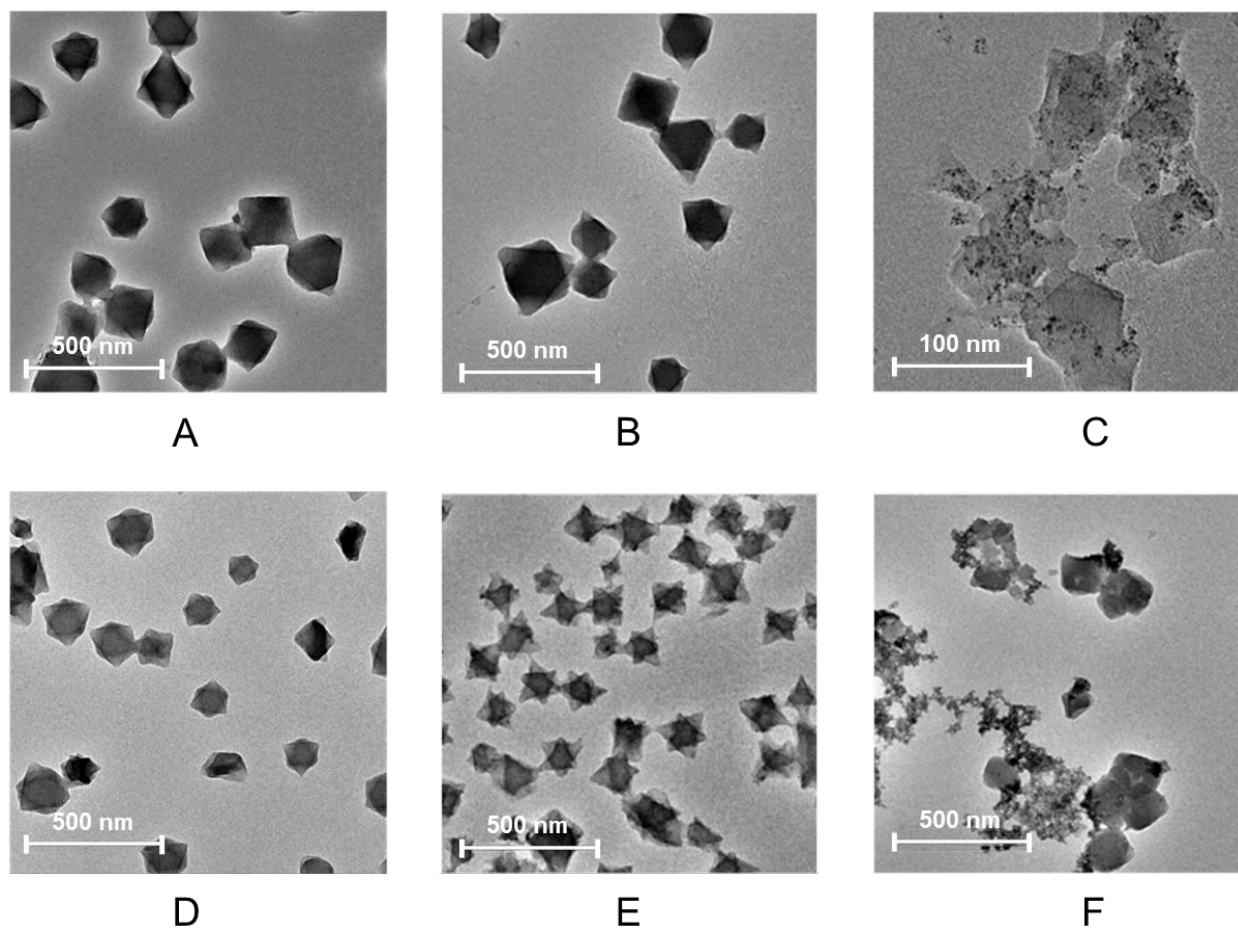

**Fig. S4** The loading capacity of the MIL-101(Fe) to FePt(R/S). (A, B, C) FePt(S) (20 mg/ 30 mg/ 40 mg),  $\text{FeCl}_3 \cdot 6\text{H}_2\text{O}$  (0.23 g, 1.384 mol) and PTA (0.402 g, 1.384 mol) were dissolved in 60 mL DMF, heated at 141°C. (D, E, F) FePt(R) (2 mg/ 4 mg/ 6 mg),  $\text{FeCl}_3 \cdot 6\text{H}_2\text{O}$  (0.23 g, 1.384 mol) and PTA (0.402 g, 1.384 mol) were dissolved in 60 mL DMF, heated at 141°C.

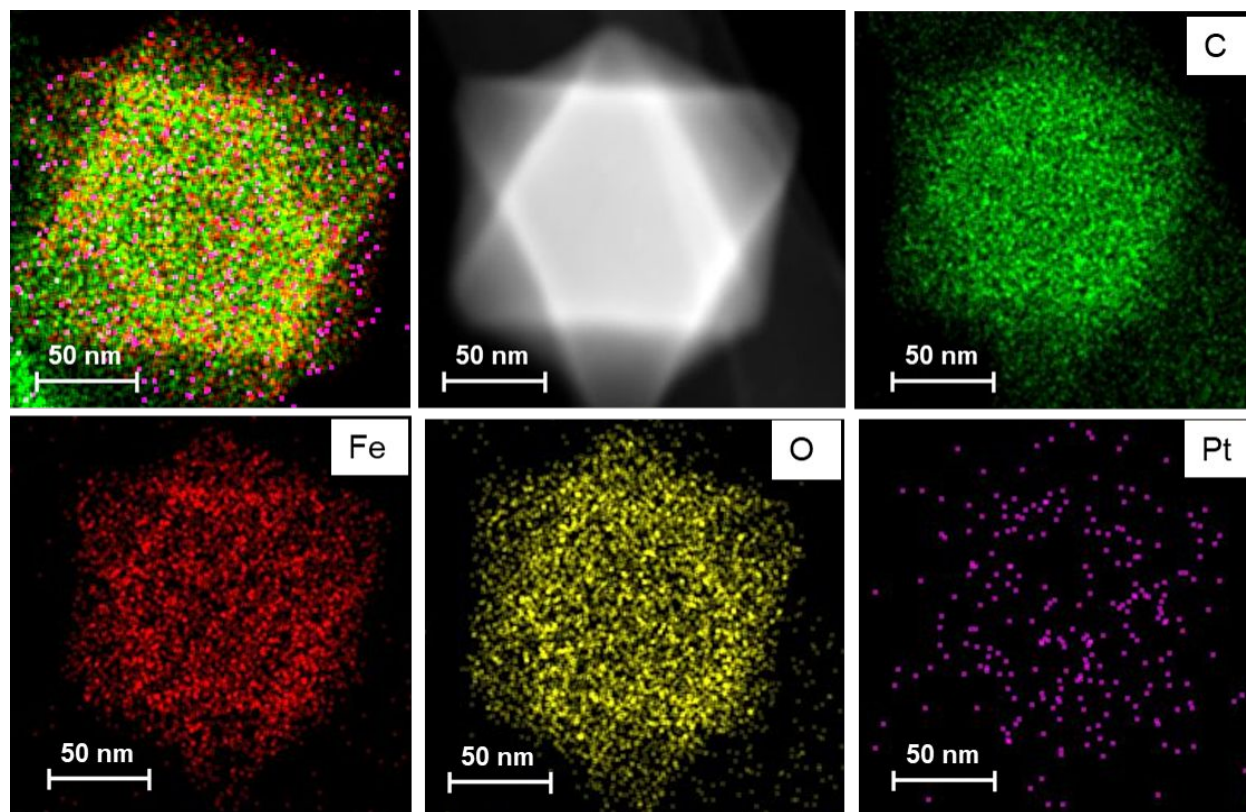

**Fig. S5** HAADF STEM image of FePt(R)-MOF nanocomposites. Corresponding elemental mapping of FePt(R)-MOF nanocomposites.

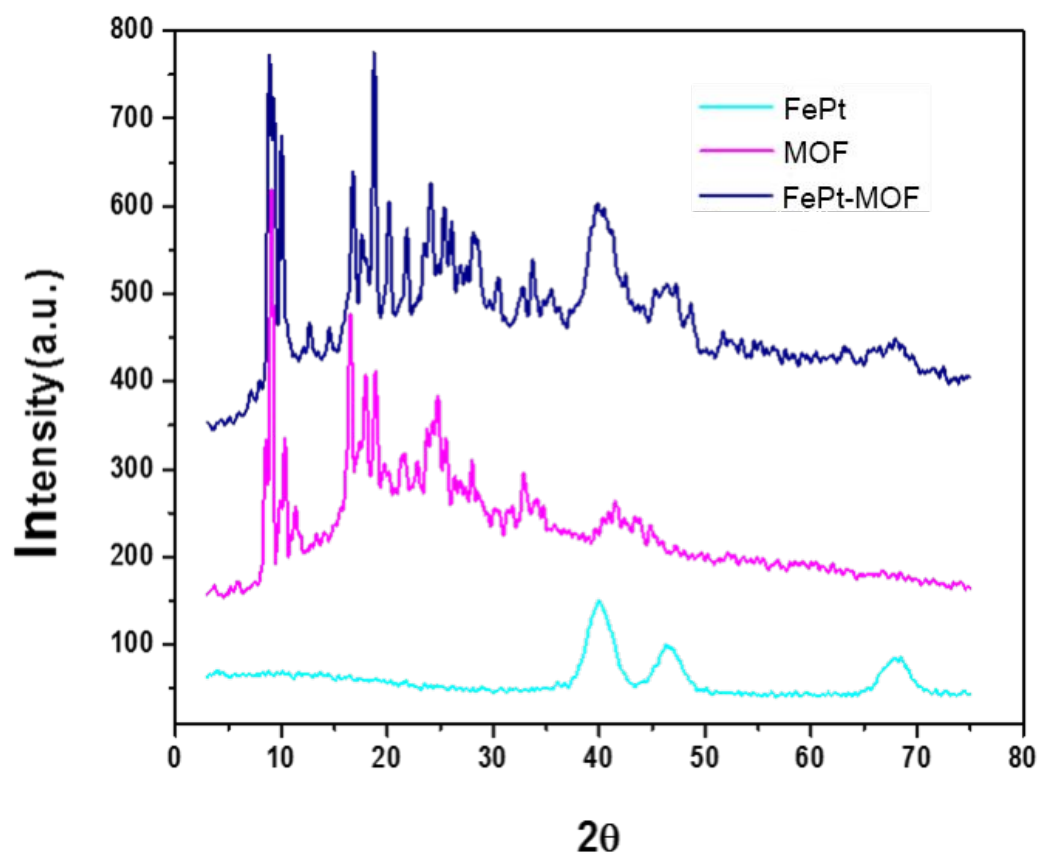

**Fig. S6** XRD patterns of FePt, MOF and FePt-MOF NCs.



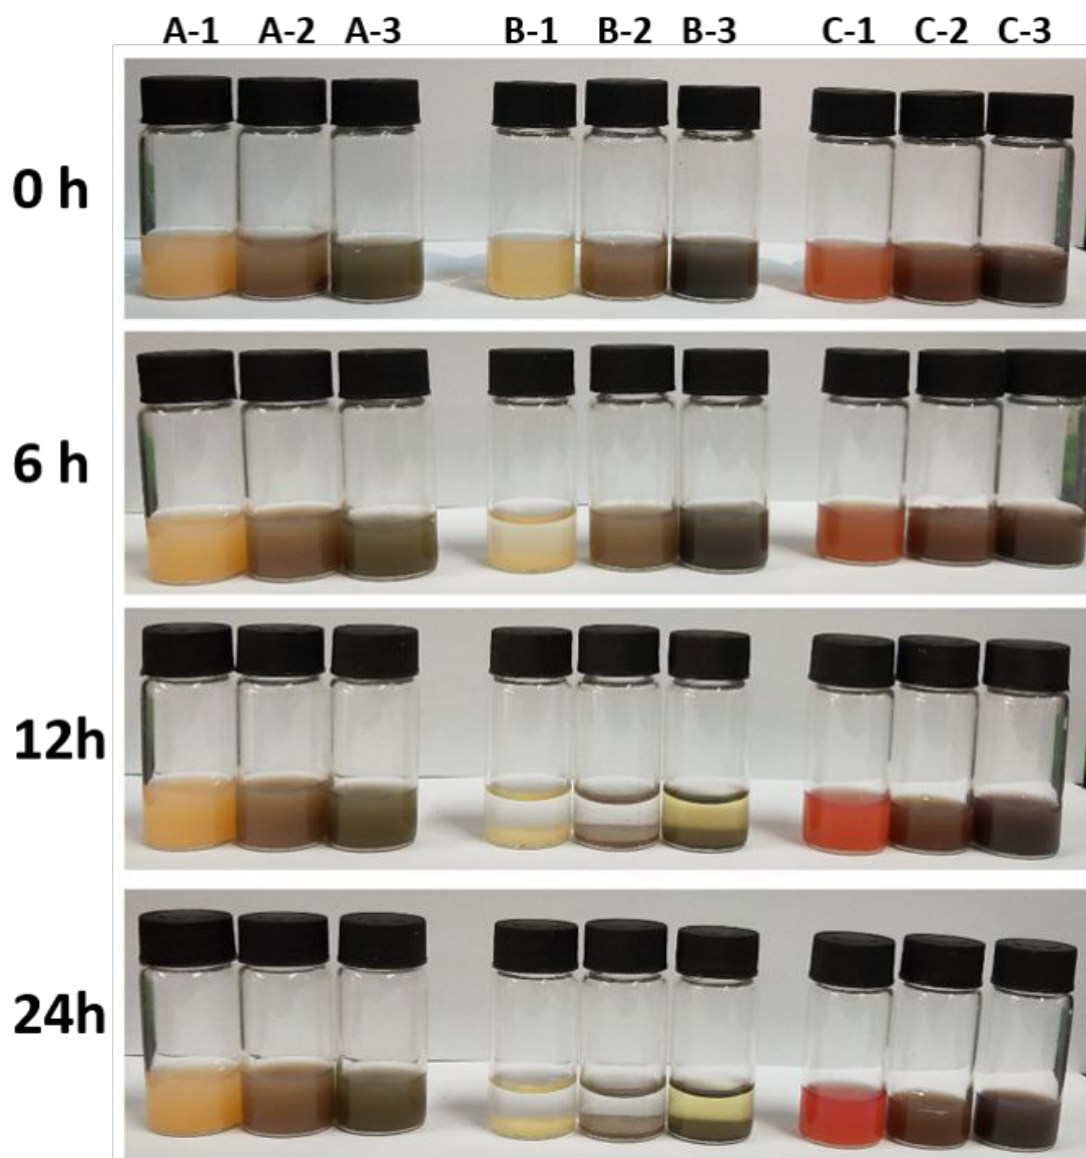

**Fig. S7** The dispersion of the as-prepared MOF (1), FePt(R)-MOF-tLyp (2) and FePt(S)-MOF-tLyp-1 (3) were dissolved in H<sub>2</sub>O (A), PBS (B) and DMEM medium (C) for 0, 6, 12 and 24 h, respectively.



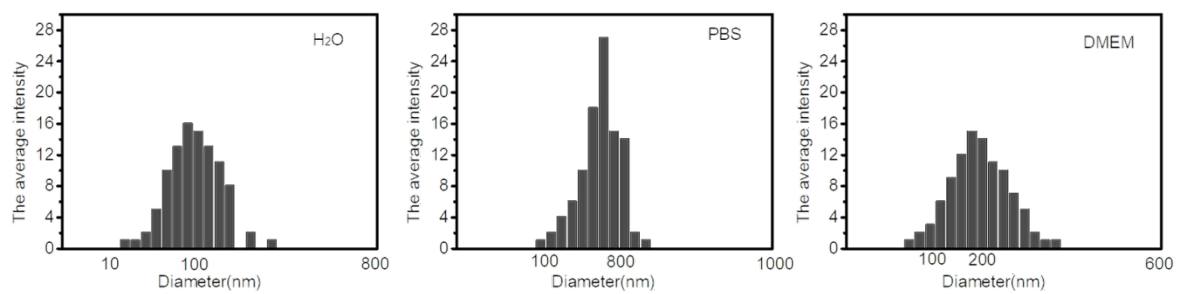

**Fig. S8** The size of MOF after 24 h in H<sub>2</sub>O, PBS and DMEM medium, respectively.

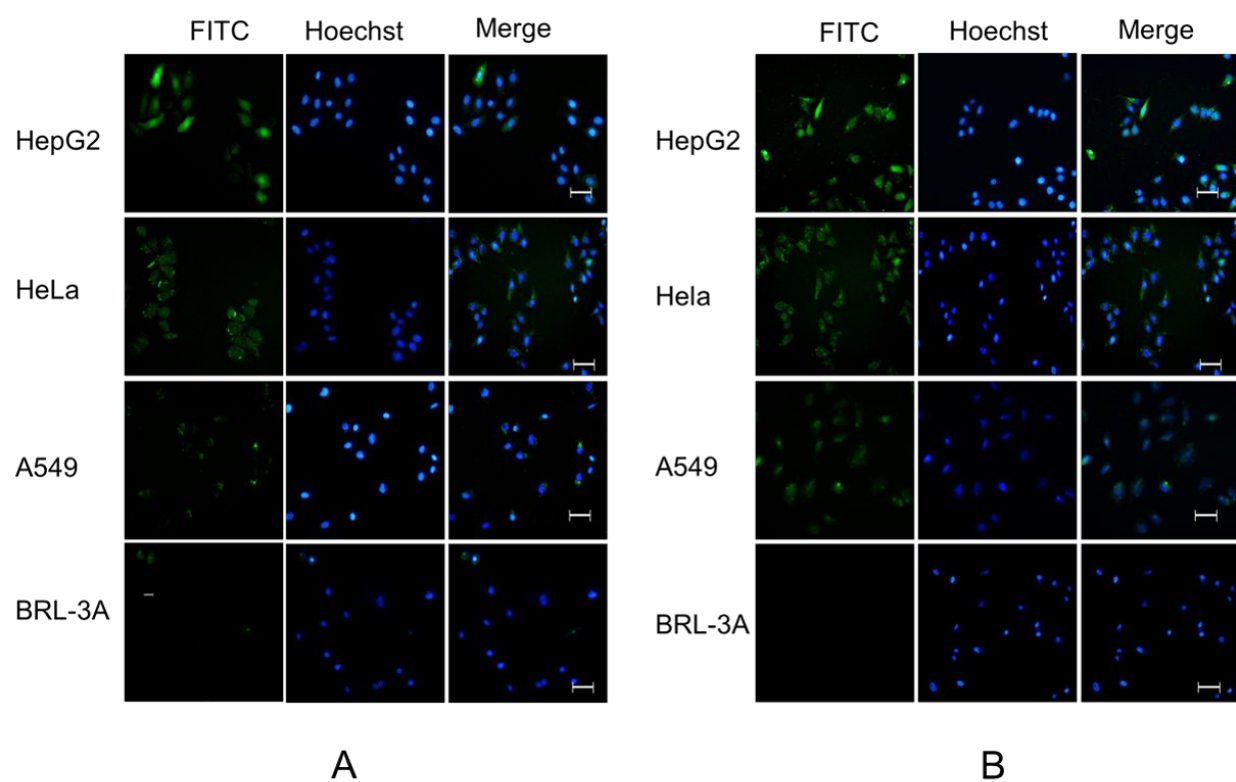

**Fig. S9** The fluorescence image of FePt(S)-MOF-tLyp-FITC NCs (A) and FePt(R)-MOF-tLyp-FITC NCs (B) , respectively. (scale bars: 200 μm)

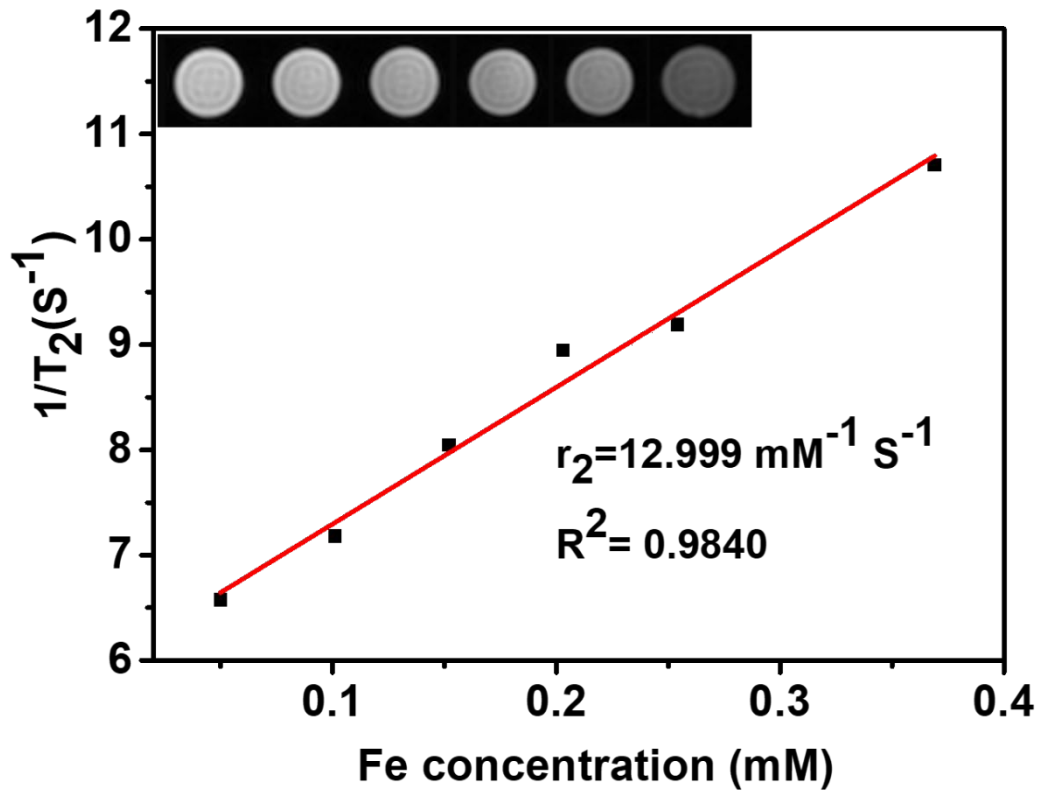

**Fig. S10** The MR imaging ( $1/T_2$ ) of FePt-MOF NCs treated with 4T1 cells. Relaxivity values were obtained from the slopes of linear fits of experimental data. (Inset:  $T_2$ -Weighted MR images of different concentrations of FePt-MOF nanocomposites)

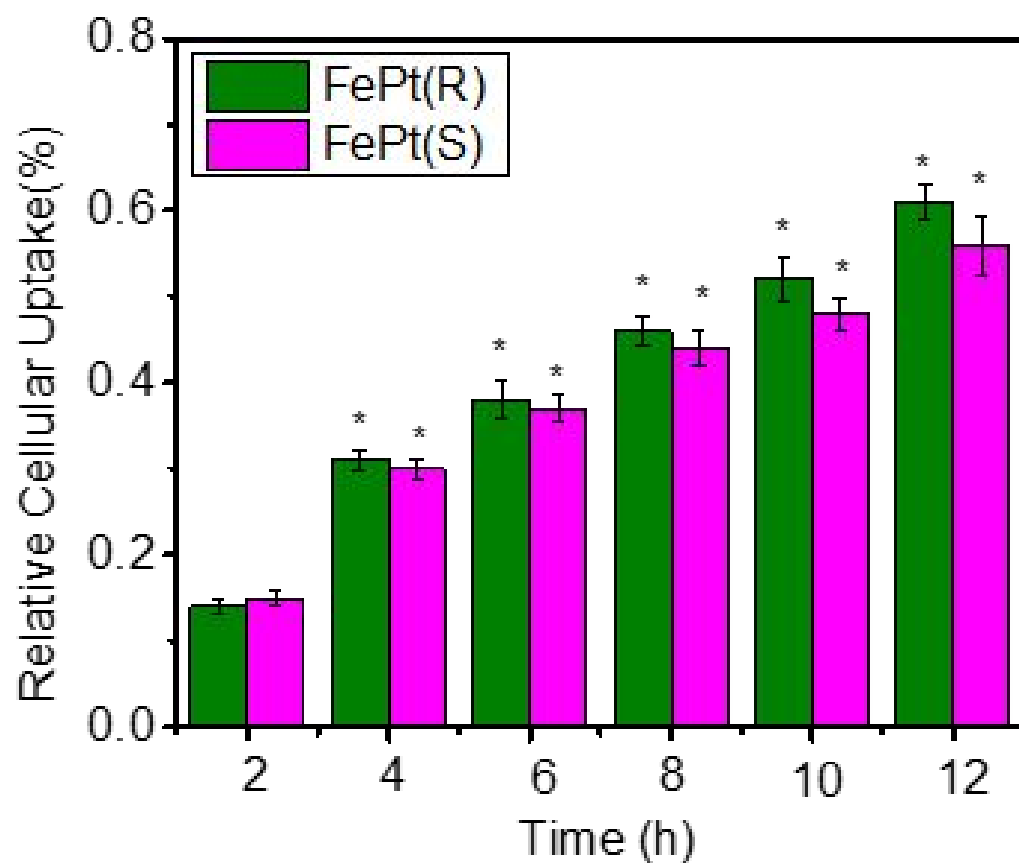

**Fig. S11** The relative cellular uptake of FePt(S)-MOF-tLyp NCs and FePt(R)-MOF-tLyp NCs toward 4T1 and L02 cells under different incubation times at the Fe concentration of 30  $\mu\text{g/mL}$ . (\* $p < 0.05$ , t-test)

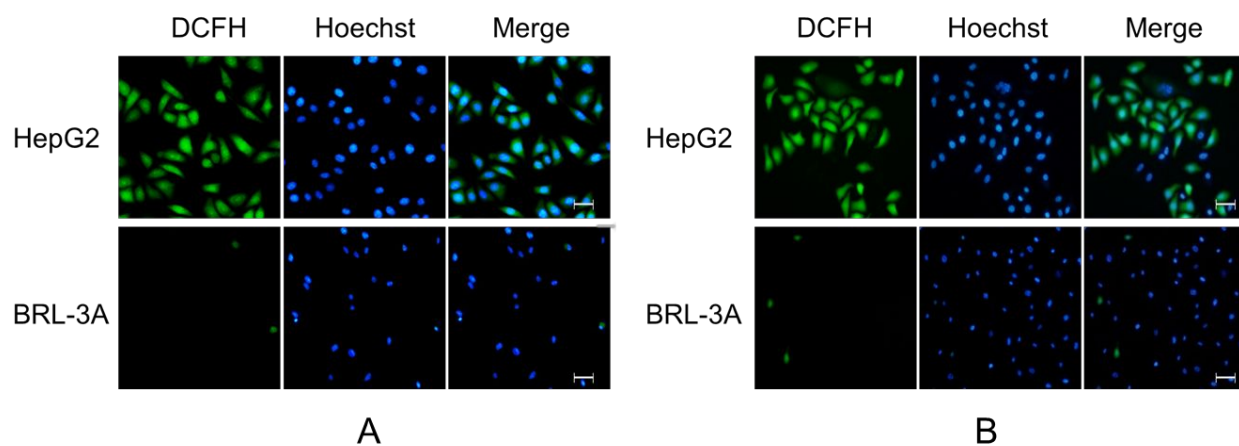

**Fig. S12** Fluorescence microscopy images of DCFH-DA labeled HepG2 and BRL-3A cells incubated with FePt(S)-MOF-tLyp-1 NCs (A) and FePt(R)-MOF-tLyp-1 NCs (B) for 8h at the Fe concentration of  $25 \text{ mg mL}^{-1}$ , respectively. (scale bars:  $200 \text{ }\mu\text{m}$ )

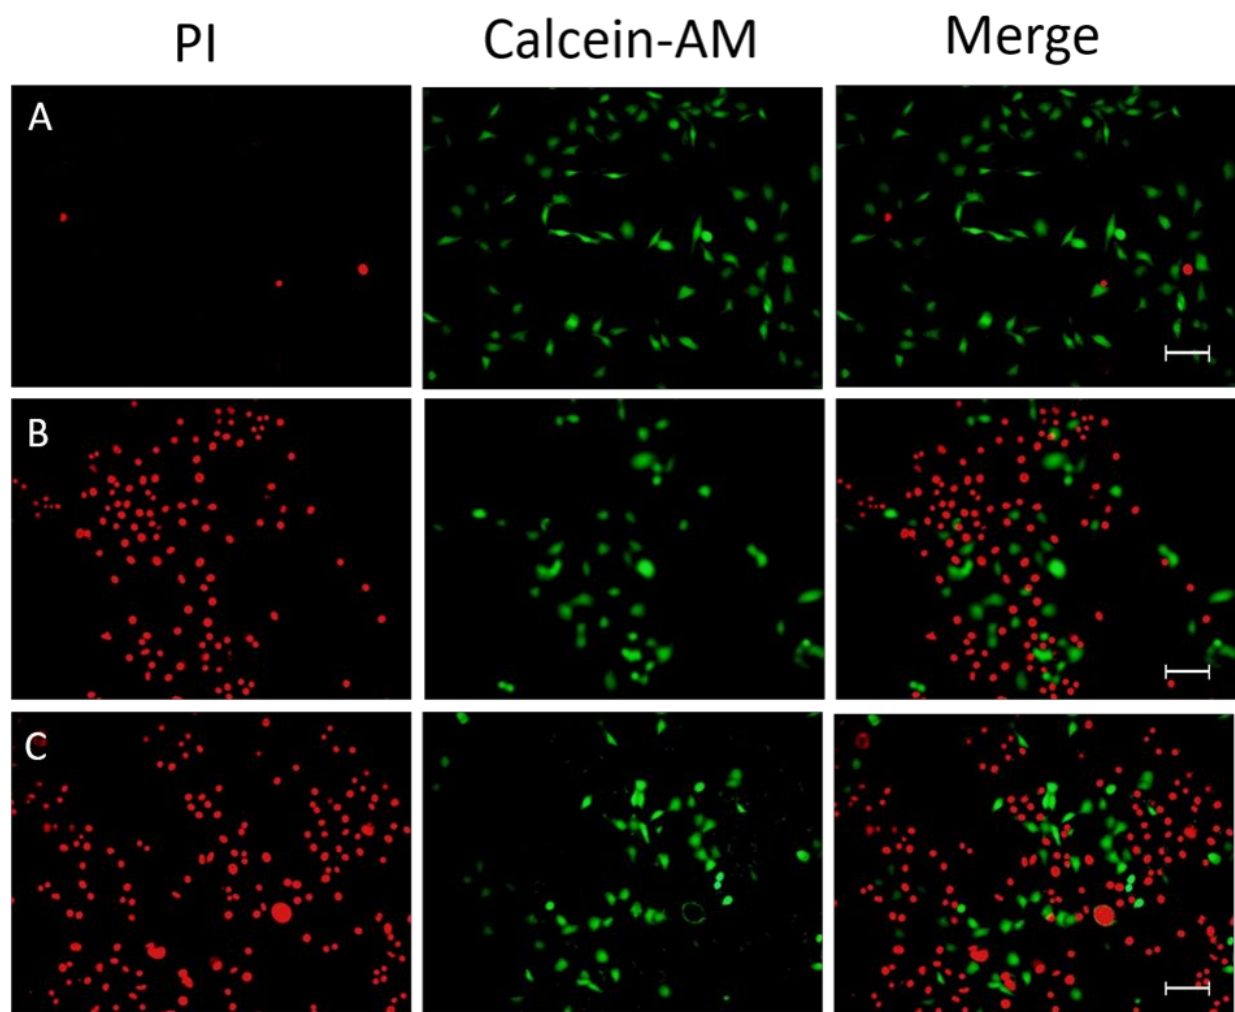

**Fig. S13** Fluorescent images of 4T1 cells co-stained by Calcein-AM (green fluorescence, live cells) and PI (red fluorescence, dead cells) of different treatments (A: Control, B: FePt(S)-MOF-tLyp-1 NCs, C: FePt(R)-MOF-tLyp-1 NCs. (scale bars: 200  $\mu$ m)

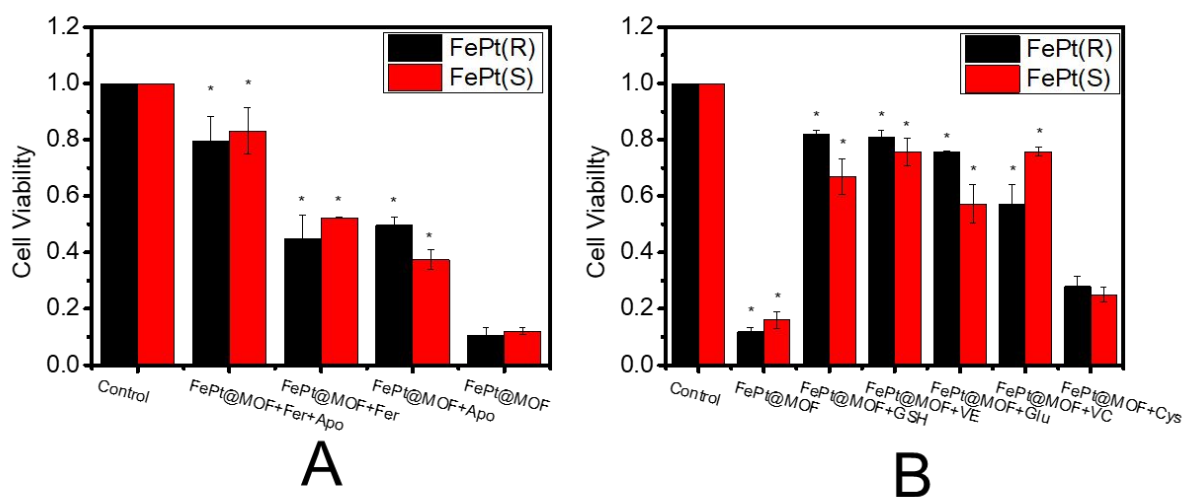

**Fig. S14** (A) The corresponding survival rates of FePt-MOF-tLyp-1 NCs , FePt-MOF-tLyp-1 NCs + Lip-1 + Apo, FePt-MOF-tLyp-1 NCs + Lip-1 and FePt-MOF-tLyp-1 NCs + Apo loaded 4T1 cells. (B) Viabilities of 4T1 cells processed with FePt-MOF-tLyp-1 NCs, FePt-MOF-tLyp-1 NCs +VE, FePt-MOF-tLyp-1 NCs +VC, FePt-MOF-tLyp-1 NCs +Glu, FePt-MOF-tLyp-1 NCs + GSH and FePt-MOF-tLyp-1 NCs +Cys. (\* $p < 0.05$ , t-test)



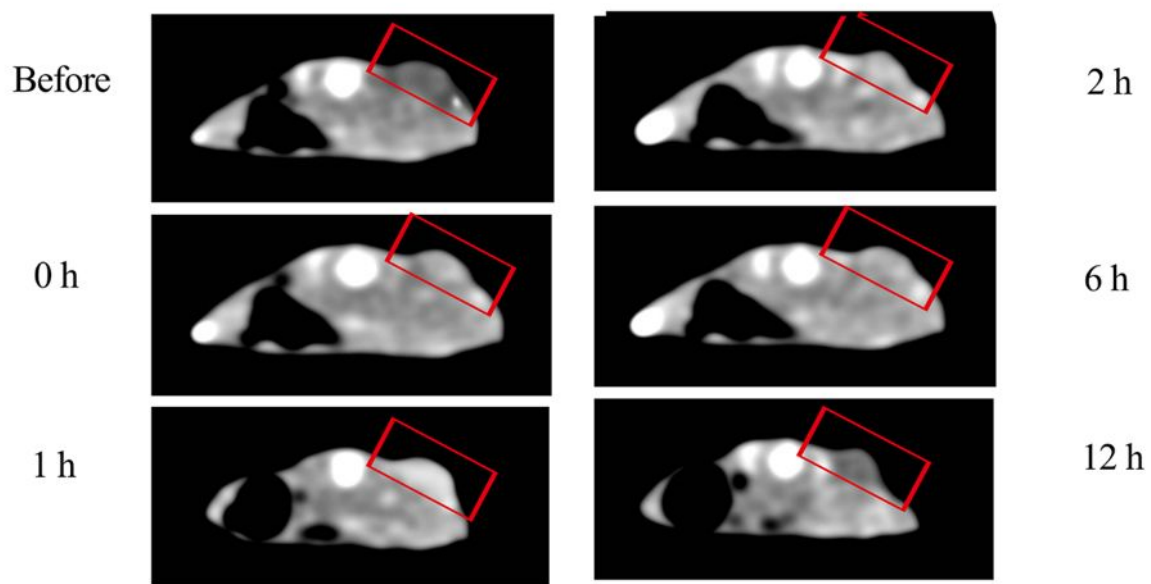

**Fig. S15** In vivo CT imaging (axial plane) of a 4T1 tumor-bearing mouse at different time intervals after intravenous injection with FePt-MOF-tLyp-1 NCs. Tumor tissue was indicated with red pane.

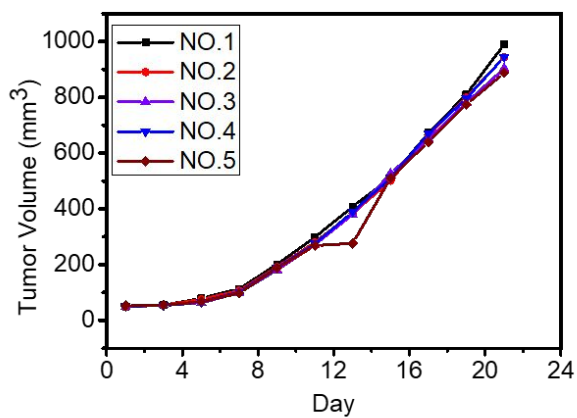

A

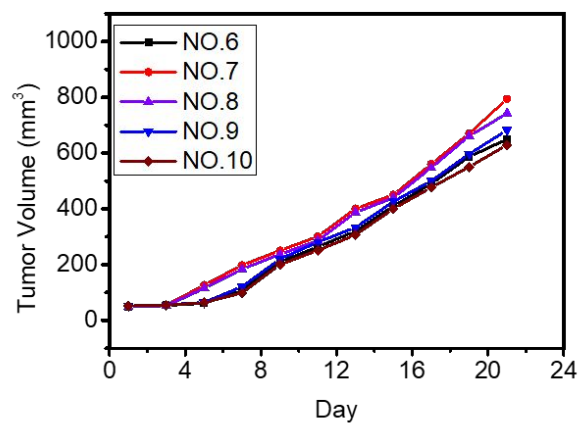

B

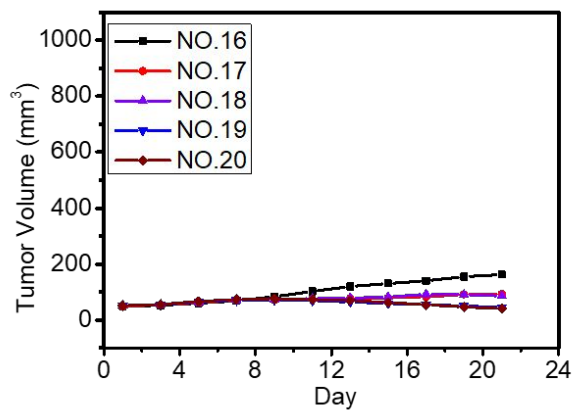

C

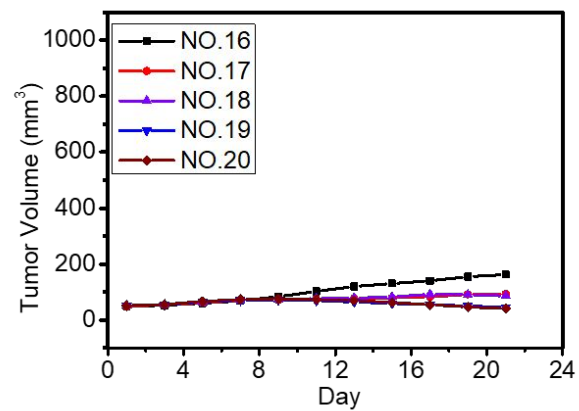

D

**Fig. S16** The body weight of every mouse during different treatments.

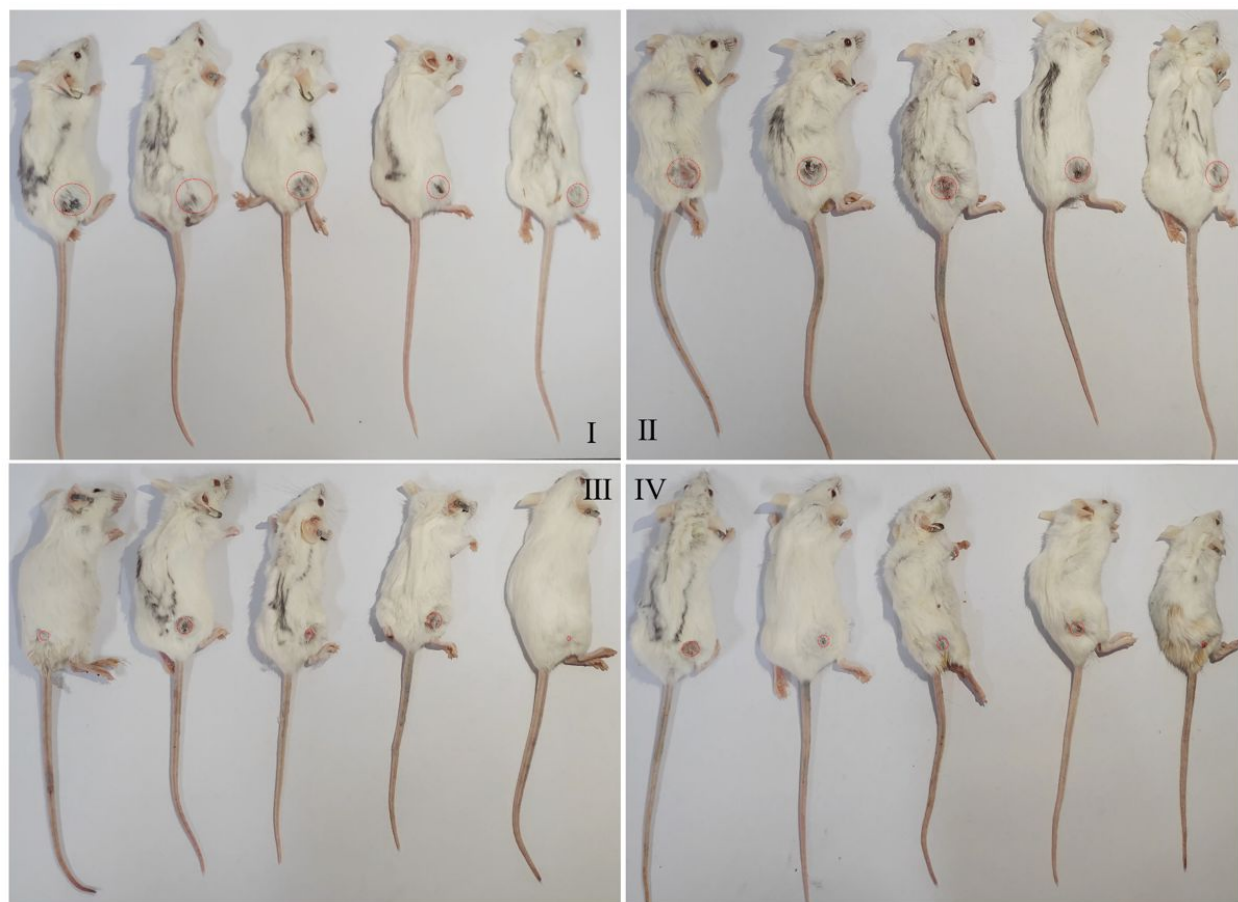

**Fig. S17** The images of mouse for different groups. ( I : PBS; II : MOF-tLyp-1; III: FePt(R)-MOF-tLyp-1; IV: FePt(S)-MOF-tLyp-1).

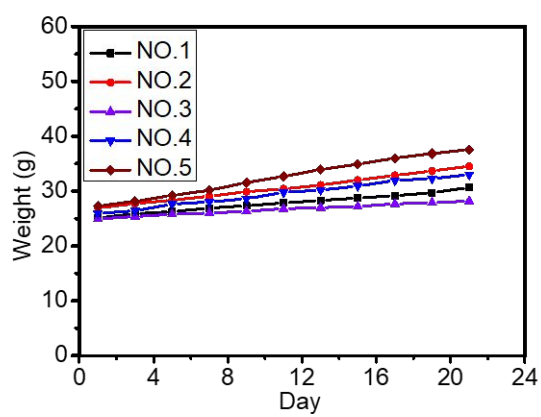

A

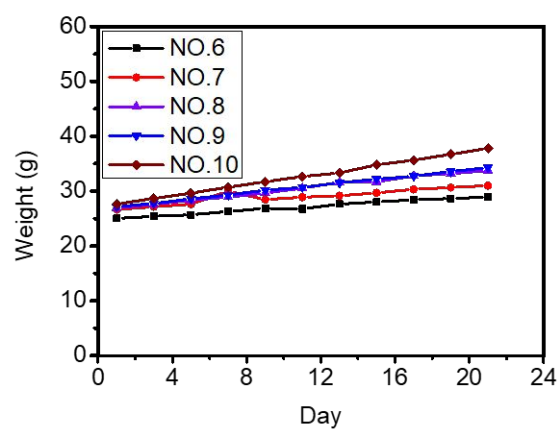

B

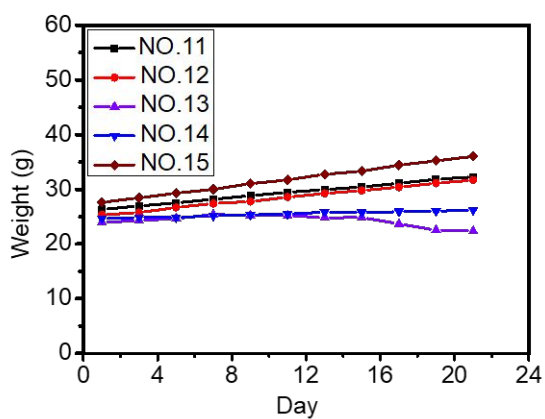

C

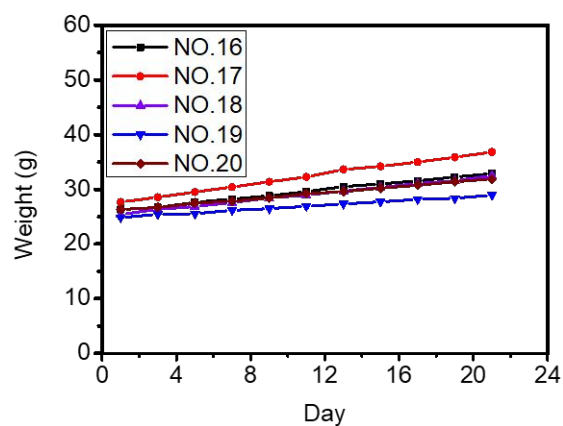

D

**Fig. S18** The volume of tumors in tumor-bearing mice of every mouse during different treatments.

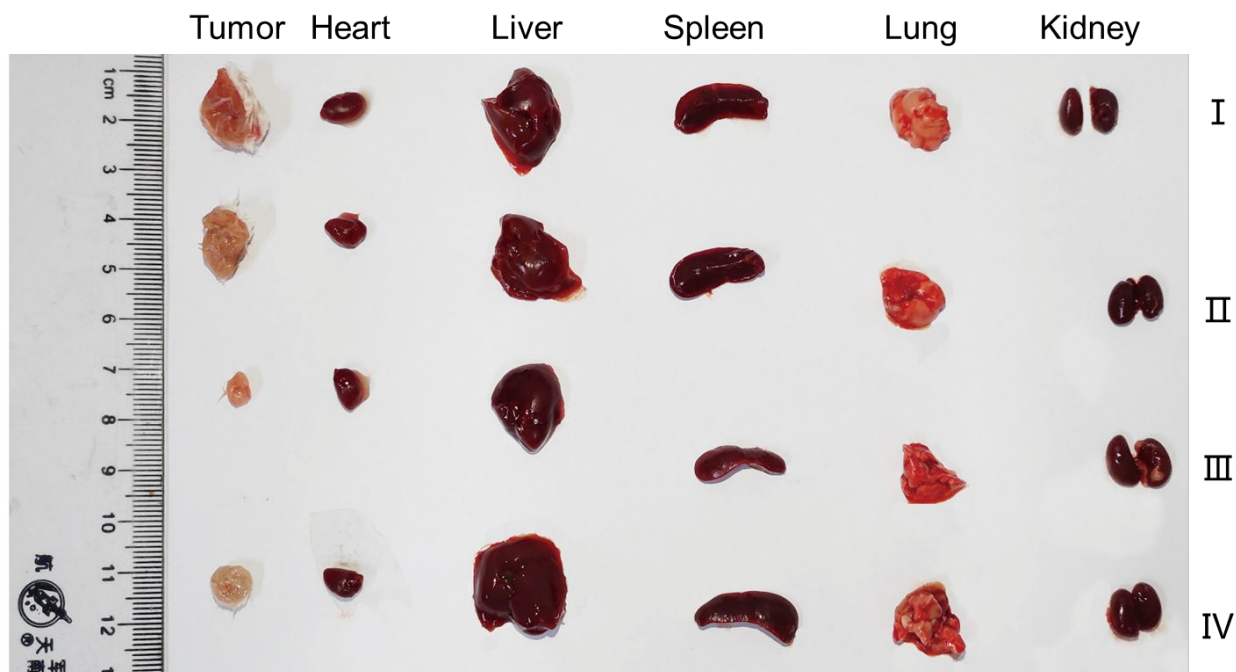

**Fig. S19** The photographs of major organs and tumors after various treatments. ( I : PBS; II : MOF-tLyp-1; III: FePt(R)-MOF-tLyp-1; IV: FePt(S)-MOF-tLyp-1)
